# Supplementary material
Source: publisher figshare collection journal article supplement (https://gsajournals.figshare.com/ndownloader/files/32400485)
Supplement: Supplementary file 1 [file 32400485]

**Supplemental Information**

**Supplemental Figure 1. Comparison of SdY wild type and SdY-I183N effect on Nr5a1/Foxl2 induced *cyp19a1a* promoter.** Data obtained in Figure 5 were compared with data from (Bertho *et al.* 2018). Statistical significances of activity changes between Foxl2 (200 ng) / Nr5a1 (100 ng)/ SdY (25 to 300 ng) and Foxl2 (200 ng) / Nr5a1 (100 ng)/ SdY-I183N (25 to 300 ng) (two-sided,Student’s *t*-test) are shown by asterisks, p<0.05 (*); p<0.001 (***).

**Supplementary Table 1.** Genotype/phenotype ratios based on PCR assay of exon 2, intron 2 and exon 3 for *sdY ­*amplification in male and female from three crosses normal family 84 x B; XY family 126xD; XY family 118xC.
